# Supplementary material
Source: MDPI journal article supplement (https://www.mdpi.com/2227-9709/4/2/10)
Supplement: s1 [file s1]

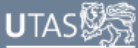

## Surveys

## Health professions students' use of social media

Carey Mather, Tracy Douglas and Jane O'Brien are conducting this research about health professions students' use of social media. The aim of the study is to examine first and final year health professions students' social media usage to determine if they are using the Internet as their primary source of information and if first year students are using social media as often as final year students

|                                   |                                                                                                                                                                                                                                                                                                                                                                                         |
|-----------------------------------|-----------------------------------------------------------------------------------------------------------------------------------------------------------------------------------------------------------------------------------------------------------------------------------------------------------------------------------------------------------------------------------------|
| <b>Research Project</b>           | Health professions students' use of social media                                                                                                                                                                                                                                                                                                                                        |
| <b>Aim of the research</b>        | The research aims to explore first and final year students' use of social media.                                                                                                                                                                                                                                                                                                        |
| <b>Survey</b>                     | Participation in the study will involve completing a questionnaire which will take approximately 5-minutes to complete.                                                                                                                                                                                                                                                                 |
| <b>Confidentiality</b>            | The questionnaire is anonymous and you will not be required to give any personal information that could identify you.                                                                                                                                                                                                                                                                   |
| <b>Participation is Voluntary</b> | Please understand that your involvement in this study is voluntary and we respect your right to withdraw from the study at any time. If you agree to be involved in the study, please click on the "NEXT" button below and you will be taken to the questionnaire which asks you about your social media usage.                                                                         |
| <b>Questions</b>                  | The questionnaire items are not of a sensitive nature: knowledge questions have multiple choice answers and free text questions are to gain an understanding of the student perspective about social media.                                                                                                                                                                             |
| <b>Use of information</b>         | Information from the questionnaire will be used in journal articles and conference presentations.                                                                                                                                                                                                                                                                                       |
| <b>Upsetting issues</b>           | It is unlikely that this research will raise any personal or upsetting issues but if it does you may wish to contact the free University of Tasmania student counselling service on (1800 332 388), or call Lifeline on 13 11 14.                                                                                                                                                       |
| <b>Storage of information</b>     | Paper documents related to the research will initially be kept in a locked filing cabinet in an office at the University of Tasmania. Any electronic data will be kept on a password protected computer in the researcher's office at the University of Tasmania. Only the research team will have access to the data.                                                                  |
| <b>Disposal of information</b>    | All the data collected in this research will be kept for a minimum of five years, after which it will be disposed of by deleting relevant computer files, and destroying or shredding hardcopy materials.                                                                                                                                                                               |
| <b>Approval</b>                   | This project has been approved by the Human Research Ethics Committee of the University of Tasmania (Approval No H0015800, Valid to 06/06/2020).                                                                                                                                                                                                                                        |
| <b>Contact details</b>            | Feel free to contact Carey Mather with any questions about this research by email at Carey.Mather@utas.edu.au or by phone on 03 6324 3149.                                                                                                                                                                                                                                              |
| <b>Complaints</b>                 | Should you have any complaints concerning the manner in which this research is conducted, please contact The Executive Officer of the Human Research Ethics Committee at:<br>Tel: (03) 62267479<br>Email: <a href="mailto:human.ethics@utas.edu.au">human.ethics@utas.edu.au</a><br>Thank you for considering this request.<br>Regards,<br>Carey Mather, Tracy Douglas and Jane O'Brien |

There are 18 questions in this survey.

[Load unfinished survey](#)
[Next](#)
[Exit and clear survey](#)

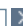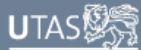

## Surveys

## Health professions students' use of social media

Carey Mather, Tracy Douglas and Jane O'Brien are conducting this research about health professions students' use of social media. The aim of the study is to examine first and final year health professions students' social media usage to determine if they are using the Internet as their primary source of information and if first year students are using social media as often as final year students

## Survey

**\*What is your age?**

Choose one of the following answers

Please choose... ▼

**\*What is your gender?**

Choose one of the following answers

Please choose... ▼

**\*Which health profession are you studying?**

Choose one of the following answers

If you choose 'Other:' please also specify your choice in the accompanying text field.

- ☐ Biomedical Science
- ☐ Exercise Science
- ☐ Environmental Health
- ☐ Health Science
- ☐ Midwifery
- ☐ Medical Radiation Science
- ☐ Medicine
- ☐ Nursing
- ☐ Paramedicine
- ☐ Pharmacy
- ☐ Dementia care
- ☐ Other (please specify)
- ☐ Other:

**\*Are you a first-year or final-year student?**

Choose one of the following answers

Please choose... ▼

**\*Do you use Facebook?**

☐ Yes ☐ No

**\*Do you use Twitter?**

☐ Yes ☐ No

**\*Do you use LinkedIn?**

☐ Yes ☐ No

**\*Which of the following media is your preferred primary source of information?**

Choose one of the following answers

- ☐ Radio  
☐ Newspapers  
☐ Magazines  
☐ Journals  
☐ Online media  
☐ Television  
☐ Other:

• Do you make decisions based on ads that you hear or read in the media from this primary source?

- ☐ Yes    ☐ No

• Which of the following platforms do you currently use and how often?

|                                  | more than once a day  | at least a few times a week | about once a week     | about once a fortnight | about once a month    | less than once a month/never |
|----------------------------------|-----------------------|-----------------------------|-----------------------|------------------------|-----------------------|------------------------------|
| Facebook                         | <input type="radio"/> | <input type="radio"/>       | <input type="radio"/> | <input type="radio"/>  | <input type="radio"/> | <input type="radio"/>        |
| MySpace                          | <input type="radio"/> | <input type="radio"/>       | <input type="radio"/> | <input type="radio"/>  | <input type="radio"/> | <input type="radio"/>        |
| Twitter                          | <input type="radio"/> | <input type="radio"/>       | <input type="radio"/> | <input type="radio"/>  | <input type="radio"/> | <input type="radio"/>        |
| Google+                          | <input type="radio"/> | <input type="radio"/>       | <input type="radio"/> | <input type="radio"/>  | <input type="radio"/> | <input type="radio"/>        |
| LinkedIn                         | <input type="radio"/> | <input type="radio"/>       | <input type="radio"/> | <input type="radio"/>  | <input type="radio"/> | <input type="radio"/>        |
| Blogs (eg Wordpress, Tumblr)     | <input type="radio"/> | <input type="radio"/>       | <input type="radio"/> | <input type="radio"/>  | <input type="radio"/> | <input type="radio"/>        |
| Wikis                            | <input type="radio"/> | <input type="radio"/>       | <input type="radio"/> | <input type="radio"/>  | <input type="radio"/> | <input type="radio"/>        |
| Skype                            | <input type="radio"/> | <input type="radio"/>       | <input type="radio"/> | <input type="radio"/>  | <input type="radio"/> | <input type="radio"/>        |
| Online community sites (Eg Ning) | <input type="radio"/> | <input type="radio"/>       | <input type="radio"/> | <input type="radio"/>  | <input type="radio"/> | <input type="radio"/>        |
| Instagram                        | <input type="radio"/> | <input type="radio"/>       | <input type="radio"/> | <input type="radio"/>  | <input type="radio"/> | <input type="radio"/>        |
| Snapchat                         | <input type="radio"/> | <input type="radio"/>       | <input type="radio"/> | <input type="radio"/>  | <input type="radio"/> | <input type="radio"/>        |
| Kik                              | <input type="radio"/> | <input type="radio"/>       | <input type="radio"/> | <input type="radio"/>  | <input type="radio"/> | <input type="radio"/>        |
| Pinterest                        | <input type="radio"/> | <input type="radio"/>       | <input type="radio"/> | <input type="radio"/>  | <input type="radio"/> | <input type="radio"/>        |
| Google Docs                      | <input type="radio"/> | <input type="radio"/>       | <input type="radio"/> | <input type="radio"/>  | <input type="radio"/> | <input type="radio"/>        |
| Academia                         | <input type="radio"/> | <input type="radio"/>       | <input type="radio"/> | <input type="radio"/>  | <input type="radio"/> | <input type="radio"/>        |
| Researchgate                     | <input type="radio"/> | <input type="radio"/>       | <input type="radio"/> | <input type="radio"/>  | <input type="radio"/> | <input type="radio"/>        |
| Yammer                           | <input type="radio"/> | <input type="radio"/>       | <input type="radio"/> | <input type="radio"/>  | <input type="radio"/> | <input type="radio"/>        |
| Other (please specify)           | <input type="radio"/> | <input type="radio"/>       | <input type="radio"/> | <input type="radio"/>  | <input type="radio"/> | <input type="radio"/>        |

Which social media sites do you think are suitable for study purposes, and why?

How do you determine the credibility of any social media or website for study purposes?

What is your favourite social media platform or website, and why?

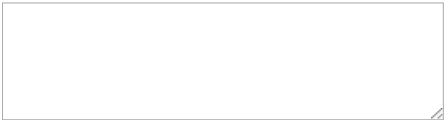

0%  100%

[Resume later](#) [Submit](#) [Exit and clear survey](#)
